# Supplementary material
Source: PubMed Central journal article supplement (PMC6935017)
Supplement: NIHMS1063603-supplement-Suupplement.pdf [file NIHMS1063603-supplement-Suupplement.pdf]

**Cell, Volume 176**

**Supplemental Information**

**Structure Studies of the CRISPR-Csm**

**Complex Reveal Mechanism**

**of Co-transcriptional Interference**

**Lilan You, Jun Ma, Jiuyu Wang, Daria Artamonova, Min Wang, Liang Liu, Hua Xiang, Konstantin Severinov, Xinzheng Zhang, and Yanli Wang**

**Table S1. Crystallographic Data Collection and Refinement Statistics. Related to Figure 1.**

| <b>Csm complex</b>                                  |                        |
|-----------------------------------------------------|------------------------|
| <b>Data collection*</b>                             |                        |
| <b>Space group</b>                                  | <i>P2</i> <sub>1</sub> |
| <b>Cell dimensions</b>                              |                        |
| <i>a, b, c</i> (Å)                                  | 123.54, 82.33, 161.36  |
| $\alpha, \beta, \gamma$ (°)                         | 90.00, 99.32, 90.00    |
| <b>Resolution</b> (Å)                               | 50.00-2.90 (3.00-2.90) |
| <i>R</i> <sub>merge</sub>                           | 0.069 (0.446)          |
| <i>I</i> / $\sigma$ <i>I</i>                        | 8.0 (2.0)              |
| <b>Completeness</b> (%)                             | 97.2 (94.7)            |
| <b>Redundancy</b>                                   | 4.5 (3.1)              |
| <b>Refinement</b>                                   |                        |
| <b>Resolution</b> (Å)                               | 2.90                   |
| <b>No. reflections</b>                              | 61,018                 |
| <i>R</i> <sub>work</sub> / <i>R</i> <sub>free</sub> | 0.200/0.235            |
| <b>No. atoms</b>                                    |                        |
| <b>protein</b>                                      | 17,386                 |
| <b>Nucleic Acid</b>                                 | 670                    |
| <b>B-factors</b> (Å <sup>2</sup> )                  |                        |
| <b>Protein</b>                                      | 53.9                   |
| <b>Nucleic Acid</b>                                 | 46.9                   |
| <b>R.m.s. deviations</b>                            |                        |
| <b>Bond length</b> (Å)                              | 0.010                  |
| <b>Bond angles</b> (°)                              | 1.388                  |
| <b>Ramachandran plot</b>                            |                        |
| <b>Favored region</b>                               | 95.3                   |
| <b>Allowed region</b>                               | 4.2                    |
| <b>Outlier region</b>                               | 0.5                    |

\* Highest resolution shell is shown in parentheses.

**Table S2. Statistics of cryo-EM Data Processing and Model Refinement. Related to Figure 2 and Figure 3.**

|                                           | Csm-CTR1 | Csm-CTR2-<br>ssDNA | Csm-CTR2-<br>dsDNA | Csm-NTR  |
|-------------------------------------------|----------|--------------------|--------------------|----------|
|                                           | EMD-9658 | EMD-9659           | EMD-9657           | EMD-9654 |
|                                           | PDB-6IFY | PDB-6IFZ           | PDB-6IFU           | PDB-6IFL |
| <b>Data collection</b>                    |          |                    |                    |          |
| Electron microscope                       |          | Titan Krios        |                    |          |
| Voltage (kV)                              |          | 300                |                    |          |
| Electron detector                         |          | K2 Summit          |                    |          |
| Electron dose (e-/Å <sup>2</sup> )        |          | 60 (32 frames)     |                    |          |
| Defocus range (µm)                        |          | 1.0~3.0            |                    |          |
| Pixel size (Å)                            |          | 1.04               |                    |          |
| <b>3D Reconstruction</b>                  |          |                    |                    |          |
| Raw images                                | 1,202    | 3,309              | 1,218              | 1,541    |
| Initial particles autopicked              | 307,576  | 1,700,254          | 684,150            | 611,889  |
| Particle for final refinement             | 46,360   | 109,805            | 75,887             | 133,127  |
| Resolution of final map (Å)               | 3.80     | 3.58               | 3.05               | 3.16     |
| FSC threshold                             | 0.143    | 0.143              | 0.143              | 0.143    |
| Map sharpening B-factor (Å <sup>2</sup> ) | -139     | -126               | -115               | -119     |
| <b>Model refinement</b>                   |          |                    |                    |          |
| R.m.s. deviations                         |          |                    |                    |          |
| Bond length (Å)                           | 0.008    | 0.013              | 0.008              | 0.006    |
| Bond angles (°)                           | 1.59     | 1.80               | 1.45               | 1.43     |
| Ramachandran statistics (%)               |          |                    |                    |          |
| Favored regions                           | 88.81    | 88.59              | 86.32              | 88.57    |
| Allowed regions                           | 11.19    | 11.32              | 12.86              | 10.92    |
| Outlier regions                           | 0.00     | 0.09               | 0.82               | 0.51     |
| Rotamer outlier (%)                       | 0.43     | 0.59               | 1.68               | 0.93     |
| Clash score                               | 9.56     | 7.71               | 8.13               | 6.81     |

**Table S3. Statistics of cryo-EM Data Processing and Model Refinement. Related to Figure 4.**

|                                           | Csm-CTR1-A<br>MPPNP | Csm-CTR1-AT<br>P | Csm-NTR-A<br>TP |
|-------------------------------------------|---------------------|------------------|-----------------|
|                                           | EMD-9653            | EMD-9660         | EMD-9656        |
|                                           | PDB-6IFK            | PDB-6IG0         | PDB-6IFR        |
| <b>Data collection</b>                    |                     |                  |                 |
| Electron microscope                       |                     | Titan Krios      |                 |
| Voltage (kV)                              |                     | 300              |                 |
| Electron detector                         |                     | K2 Summit        |                 |
| Electron dose (e-/Å <sup>2</sup> )        |                     | 60 (32 frames)   |                 |
| Defocus range (µm)                        |                     | 1.0~3.0          |                 |
| Pixel size (Å)                            |                     | 1.04             |                 |
| <b>3D Reconstruction</b>                  |                     |                  |                 |
| Raw images                                | 893                 | 1,525            | 1,477           |
| Initial particles autopicked              | 364,667             | 598,192          | 644,624         |
| Particle for final refinement             | 61,538              | 58,587           | 54,012          |
| Resolution of final map (Å)               | 3.20                | 3.37             | 3.40            |
| FSC threshold                             | 0.143               | 0.143            | 0.143           |
| Map sharpening B-factor (Å <sup>2</sup> ) | -128                | -133             | -133            |
| <b>Model refinement</b>                   |                     |                  |                 |
| R.m.s. deviations                         |                     |                  |                 |
| Bond length (Å)                           | 0.007               | 0.009            | 0.007           |
| Bond angles (°)                           | 1.30                | 1.35             | 1.33            |
| Ramachandran statistics (%)               |                     |                  |                 |
| Favored regions                           | 89.50               | 88.31            | 87.07           |
| Allowed regions                           | 10.32               | 11.46            | 12.75           |
| Outlier regions                           | 0.18                | 0.22             | 0.18            |
| Rotamer outlier (%)                       | 0.85                | 0.64             | 0.80            |
| Clash score                               | 6.84                | 7.13             | 7.45            |
